# Supplementary material for: Hollow magnetic hydroxyapatite microspheres with hierarchically mesoporous microstructure for pH-responsive drug delivery
Source: Royal Society of Chemistry journal article supplement (doi:10.1039/c3ce26683d), 2013-01-01
Supplement: c3ce26683d.pdf [file c3ce26683d.pdf]

# Hollow magnetic hydroxyapatite microspheres with hierarchically mesoporous microstructure for pH-responsive drug delivery

Kaili Lin,<sup>\*,a</sup> Lei Chen<sup>a</sup>, Peiyi Liu<sup>b</sup>, Zhaoyong Zou<sup>a</sup>, Meili Zhang<sup>a</sup>, Yuhui Shen<sup>b</sup>, Yuqin Qiao<sup>a</sup>, Xuanyong Liu<sup>a</sup> and Jiang Chang<sup>\*,a</sup>

<sup>a</sup>State Key Laboratory of High Performance Ceramics and Superfine Microstructure, Shanghai Institute of Ceramics, Chinese Academy of Sciences, 1295 Dingxi Road, Shanghai 200050, P.R. China.

<sup>b</sup>Department of Orthopaedics, Shanghai Institute of Orthopaedics & Traumatology, Shanghai Ruijin Hospital, Shanghai Jiaotong University School of Medicine, China.

Fax: 86 21 52413903; Tel: 86 21 52412810; E-mail: lklsic@mail.sic.ac.cn (K. Lin); jchang@mail.sic.ac.cn (J. Chang)

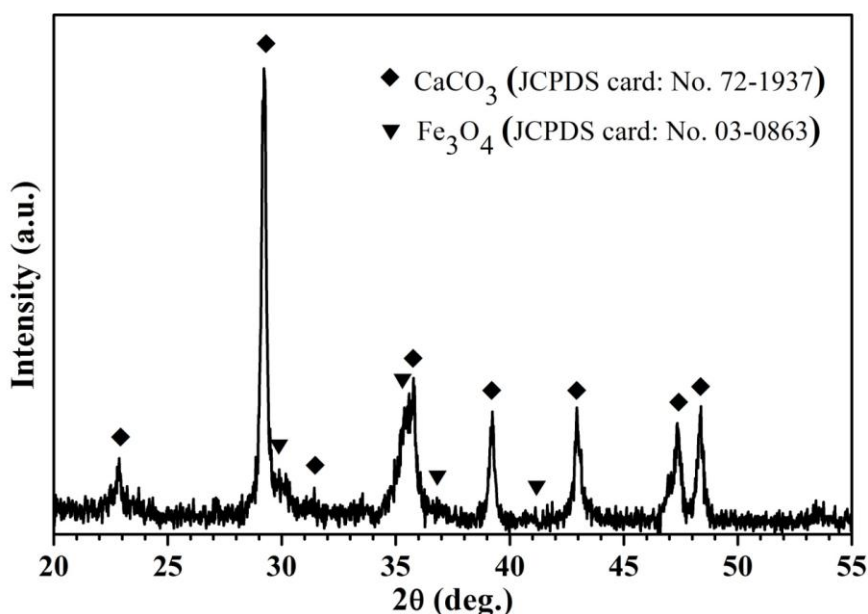

**Fig. S1.** XRD for CaCO<sub>3</sub>/Fe<sub>3</sub>O<sub>4</sub> hollow microspheres with 50 wt.% Fe<sub>3</sub>O<sub>4</sub> component.

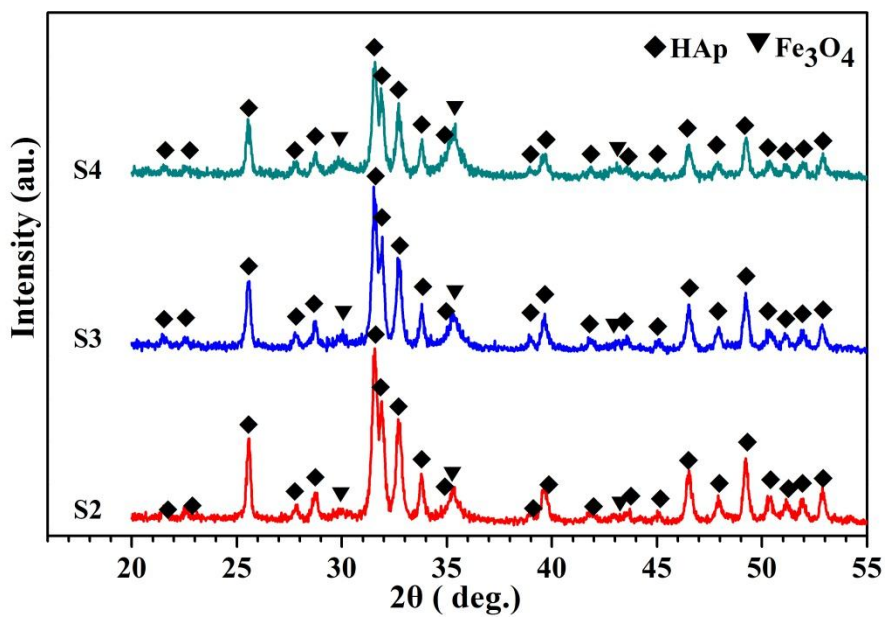

**Fig. S2** XRD patterns of the samples with similar composite ratio directly mixed by the Fe<sub>3</sub>O<sub>4</sub> and the hydrothermally synthesized HAp powders.

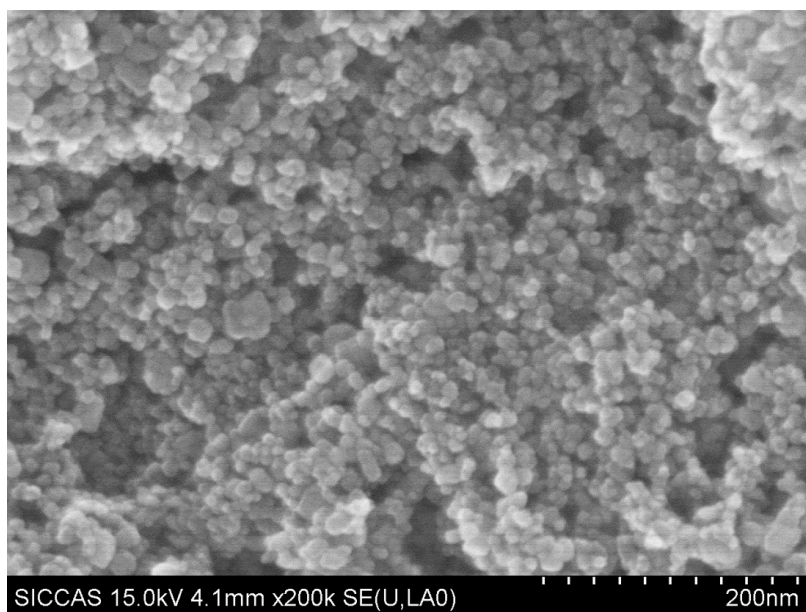

**Fig. S3.** Morphology image of the raw Fe<sub>3</sub>O<sub>4</sub> nanoparticles.

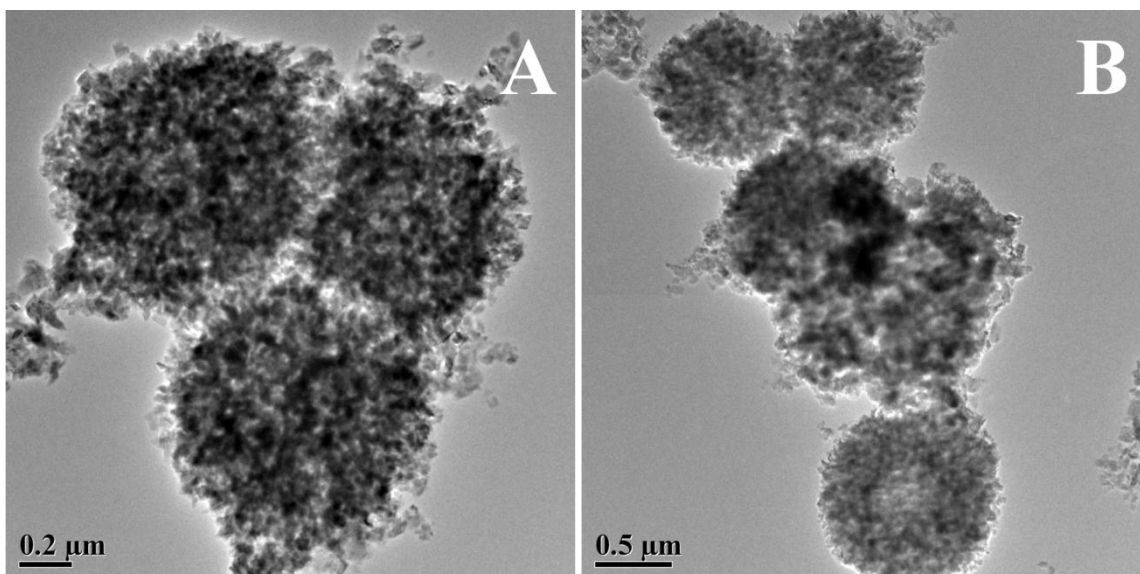

**Fig. S4.** TEM for  $\text{CaCO}_3/\text{Fe}_3\text{O}_4$  hollow microspheres with 25 wt.%  $\text{Fe}_3\text{O}_4$  component synthesized using very dilute solutions ( $[\text{CaCl}_2]=0.002\text{ M}$  and  $[\text{Na}_2\text{CO}_3]=0.002\text{ M}$ ) (A) and hydrothermal transformed to the hollow magnetic HAp microspheres (B).

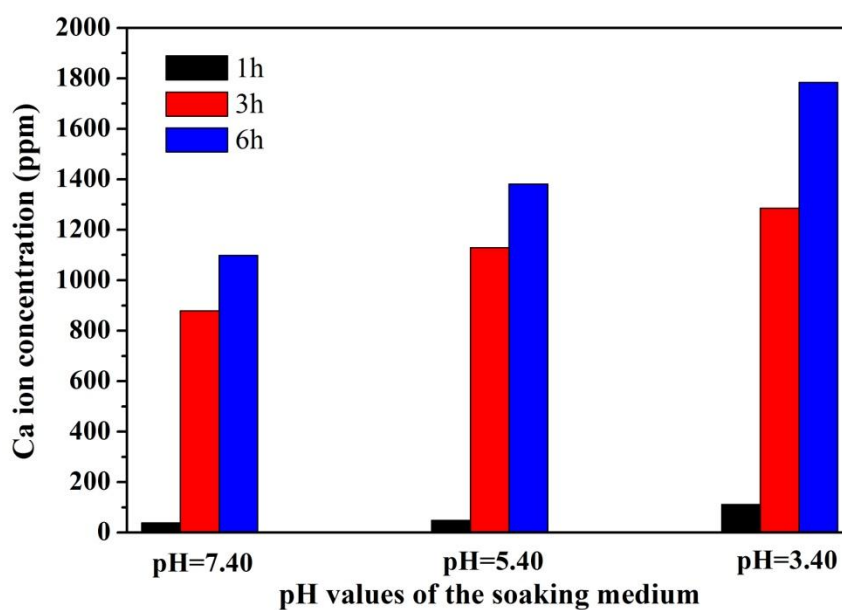

**Fig. S5.** The concentrations of the  $\text{Ca}^{2+}$  ion released from sample S3 in different pH PBS without refreshing the soaking medium.

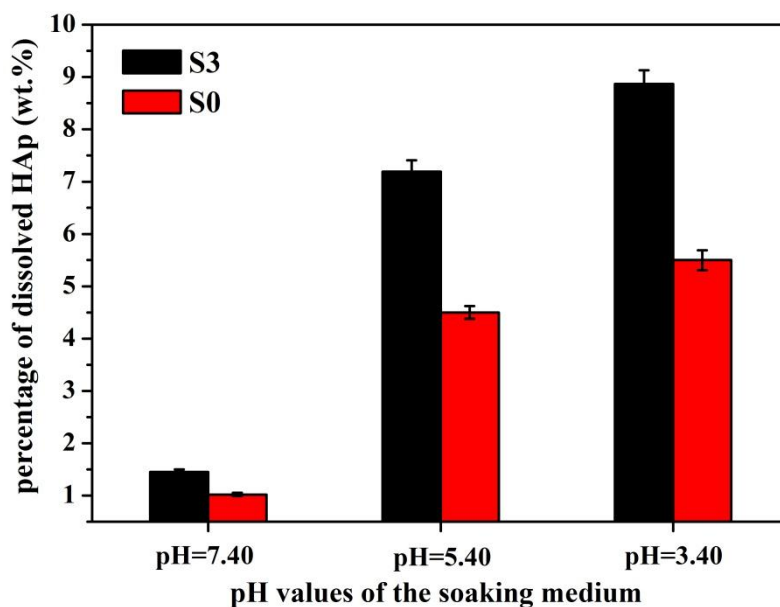

**Fig. S6.** The percentage of the dissolved HAp from magnetic HAp hollow microspheres (sample S3) and the control HAp nanoparticles (sample S0) after cumulative drug release in different pH PBS up to 48 h.
